# Supplementary material
Source: PubMed Central journal article supplement (PMC2042202)

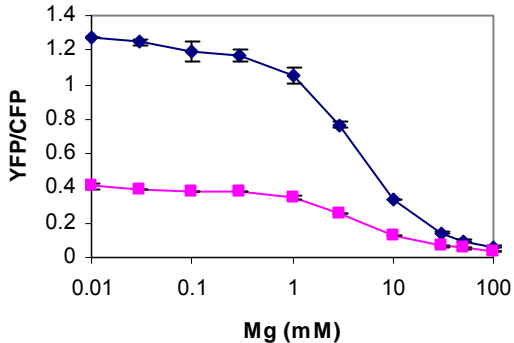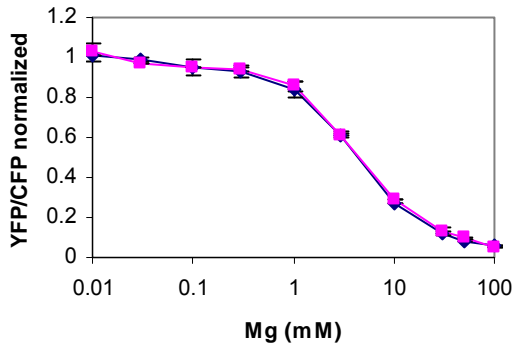

Supplement: pnas_0700025104_1.pdf [file pnas_0700025104_1.pdf]

***mgtA***

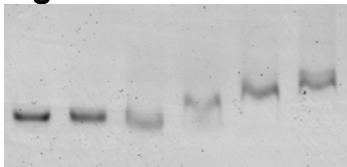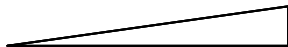

**PhoP**

***phoPQ***

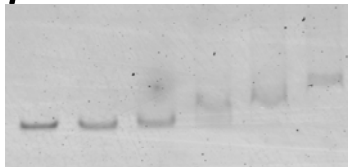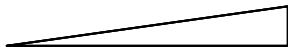

**PhoP**

***mgrB***

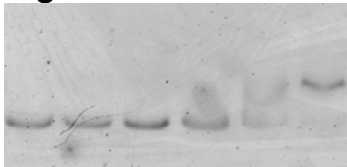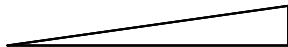

**PhoP**

***hemL***

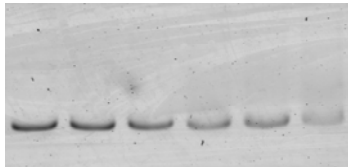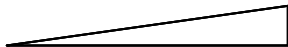

**PhoP**

Supplement: pnas_0700025104_2.pdf [file pnas_0700025104_2.pdf]

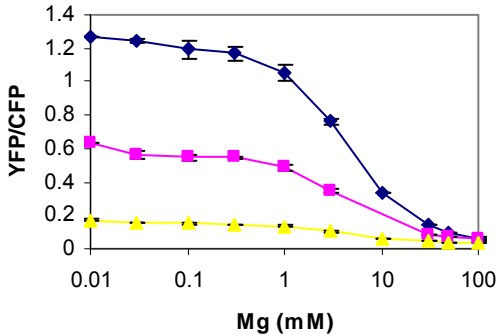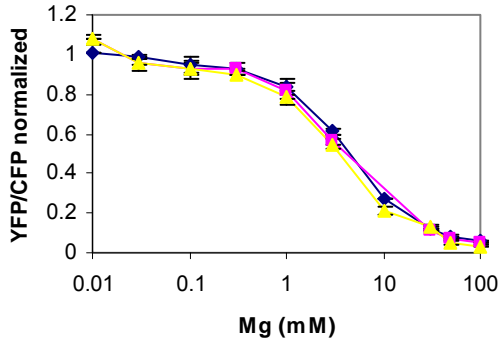

Supplement: pnas_0700025104_3.pdf [file pnas_0700025104_3.pdf]

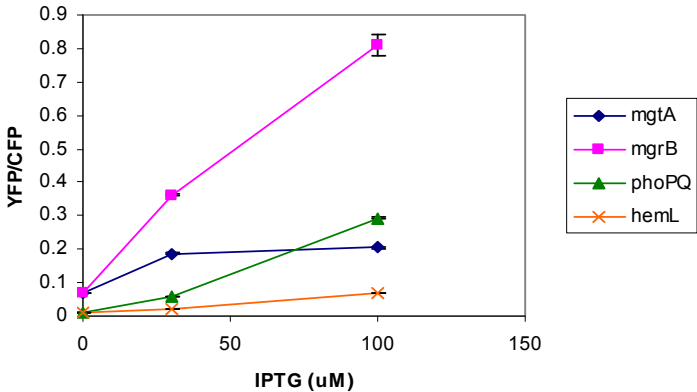

Supplement: pnas_0700025104_4.pdf [file pnas_0700025104_4.pdf]
